# Supplementary material for: Reactions of in situ generated hydrated organotin cations with chelating O,O- or O,N-ligands: a possible structure-directing influence of the organic substituent on tin
Source: Royal Society of Chemistry journal article supplement (doi:10.1039/c003339a), 2010-11-18
Supplement: c003339a.pdf [file c003339a.pdf]

**Supporting Information**

Reactions of in situ Generated Hydrated Organotin  
Cations with Chelating *O,O*- or *O,N*- Ligands: A  
Possible Structure-directing Influence of the Organic  
Substituent on Tin

*Vadapalli Chandrasekhar,\* and Puja Singh*

Department of Chemistry, Indian Institute of Technology Kanpur, Kanpur – 208016, India.

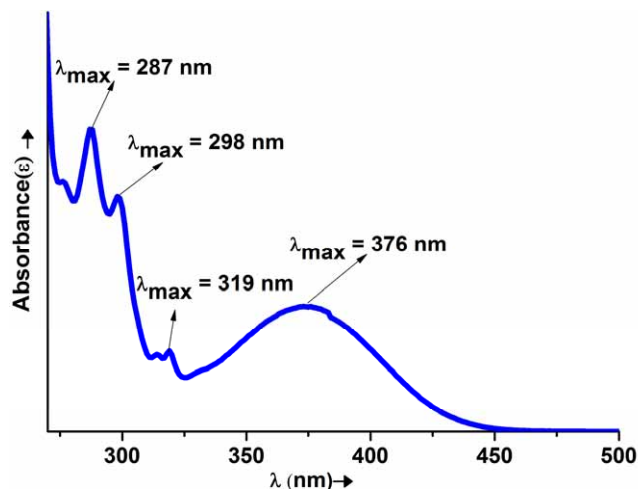

(a)

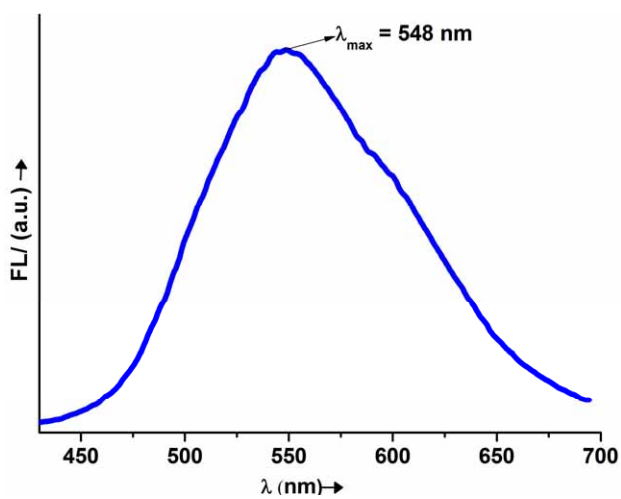

(b)

**Figure S1(a).** UV-visible absorption spectrum of methanol solution of **6** ( $10^{-6}$  M). **(b)** Fluorescence emission spectra of **6** in methanol ( $10^{-6}$  M)

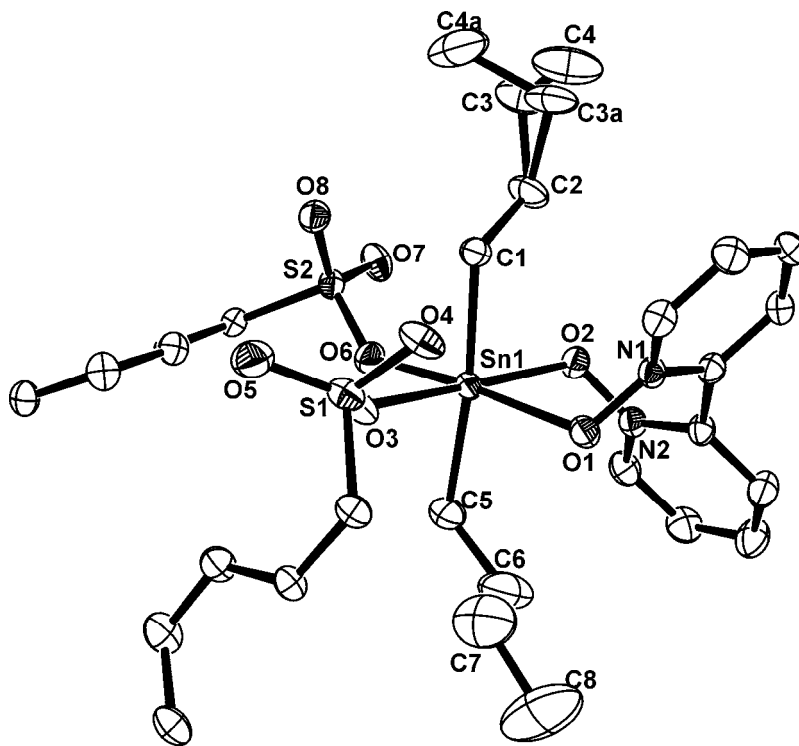

**Figure S2.** ORTEP representation of the asymmetric unit of **1**, shown at 50 % probability displacement ellipsoids. Hydrogens atoms are not shown.

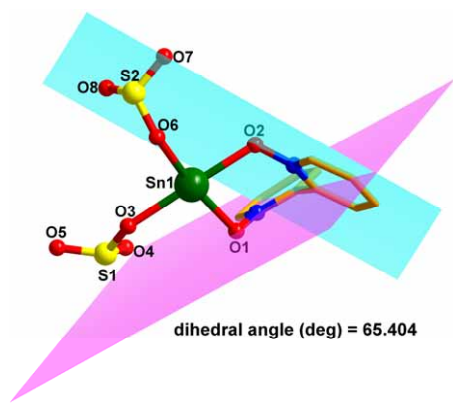

(a)

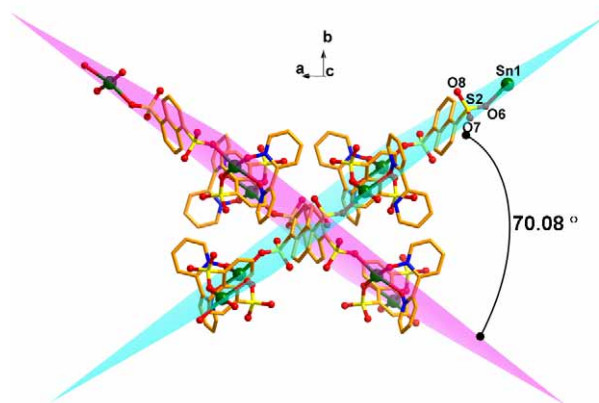

(b)

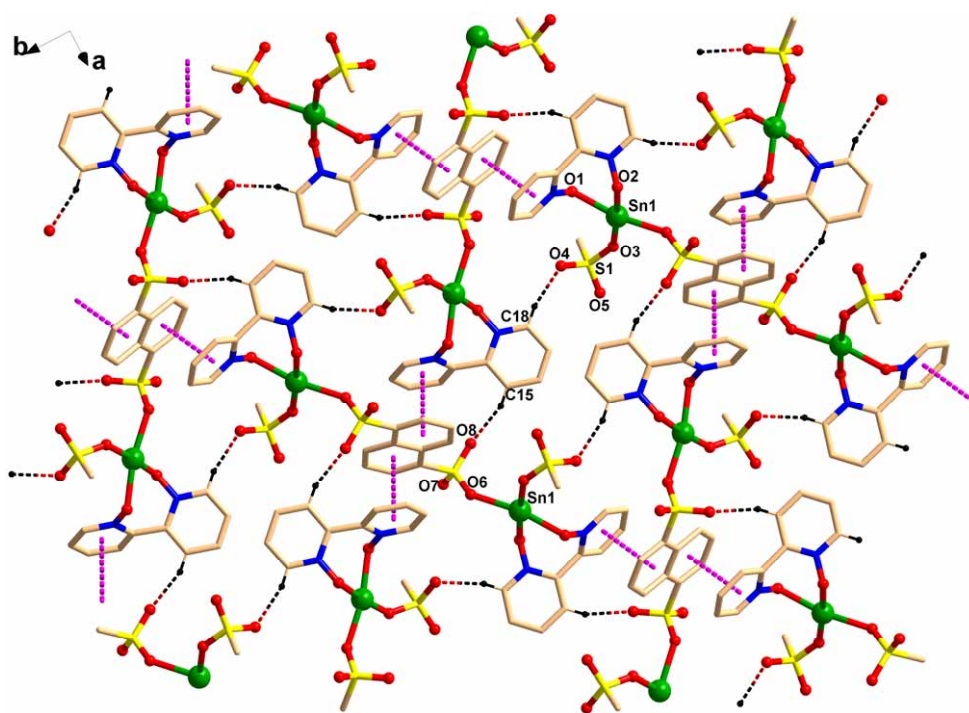

(c)

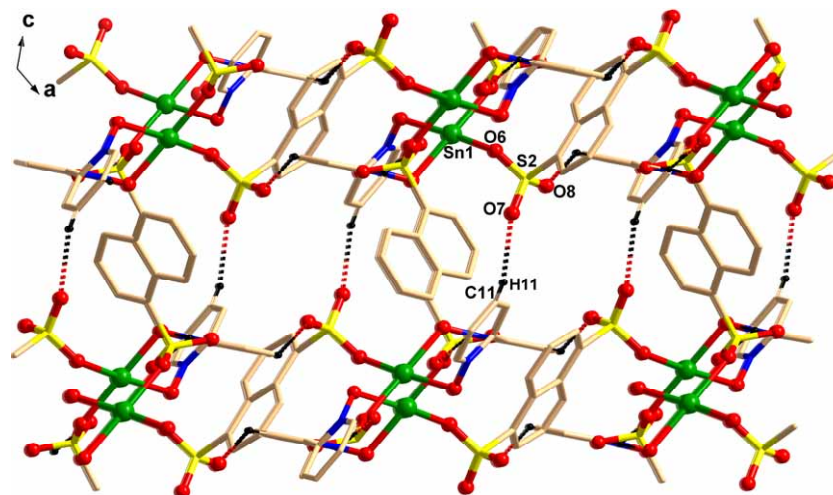

(d)

**Figure S3.** (a) Twisting of the two aromatic rings of BPDO-I in **1** (at an angle of  $65.40^\circ$ ). (b) Two 1D-chains of **1** cross each other and are oriented at an angle of  $70.07(6)^\circ$  with respect to each other (c) Cross-section of **1** across the  $ab$  plane, 1D- chains cross each other and glued together through strong C–H $\cdots$ O and  $\pi\cdots\pi$  interactions. The H $\cdots$ A ('A' = acceptor) distances involved in these C–H $\cdots$ O contacts are: C15–H15 $\cdots$ O8 2.484(3) Å and C18–H18 $\cdots$ O4 2.433(3) Å. (d) View across the  $ac$  plane, showing another set of C–H $\cdots$ O interaction, assisting the formation of three dimensional assembly of **1** (C11–H11 $\cdots$ O7 2.460(5) Å,  $144.99(31)^\circ$ ).

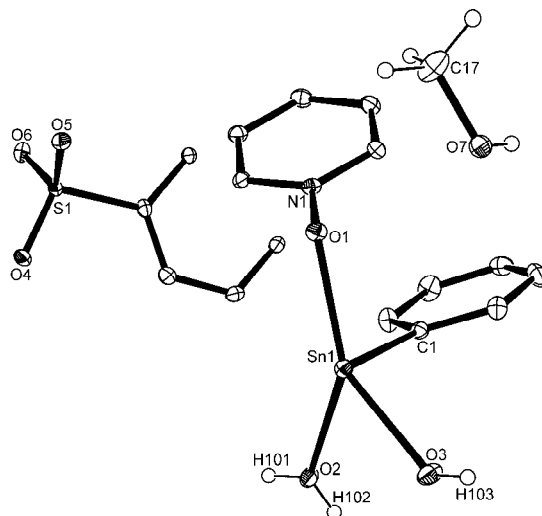

**Figure S4:** ORTEP representation of the asymmetric unit of **2**, shown at 50 % probability displacement ellipsoids. Only hydrogens of methanol and water molecules are shown.

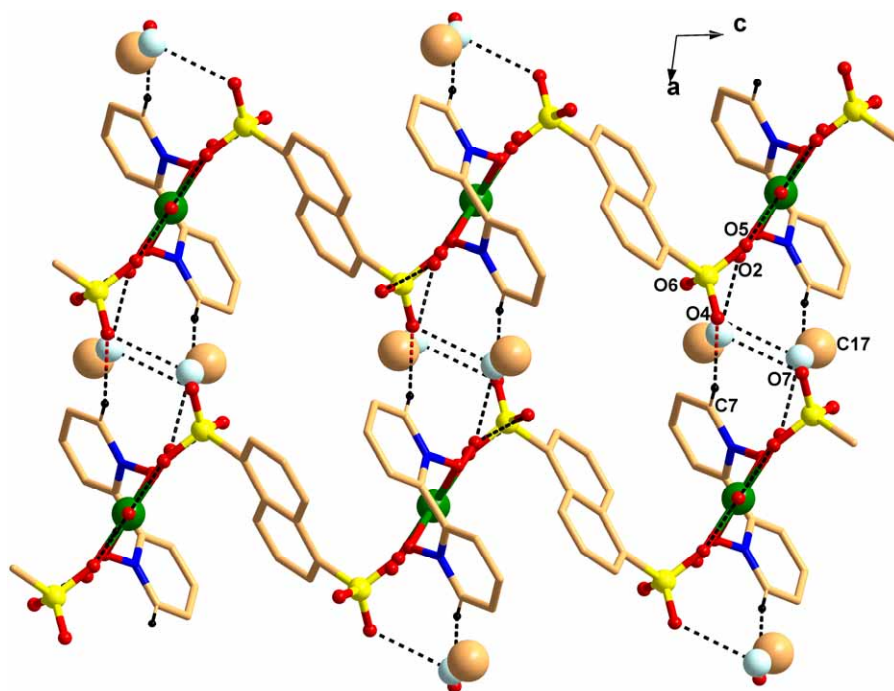

**Figure S5:** This figure reveals the presence of guest (methanol, C17 O7) molecules (shown in *space-filling* model) in between H-bonded layers of  $2 \cdot 2\text{CH}_3\text{OH}$ . They are involved in forming strong O–H $\cdots$ O and C–H $\cdots$ O contacts with BPDO-I and 1,5-naphthalenedisulfonate moieties of adjacent layers. For metric parameters see Table S5B.

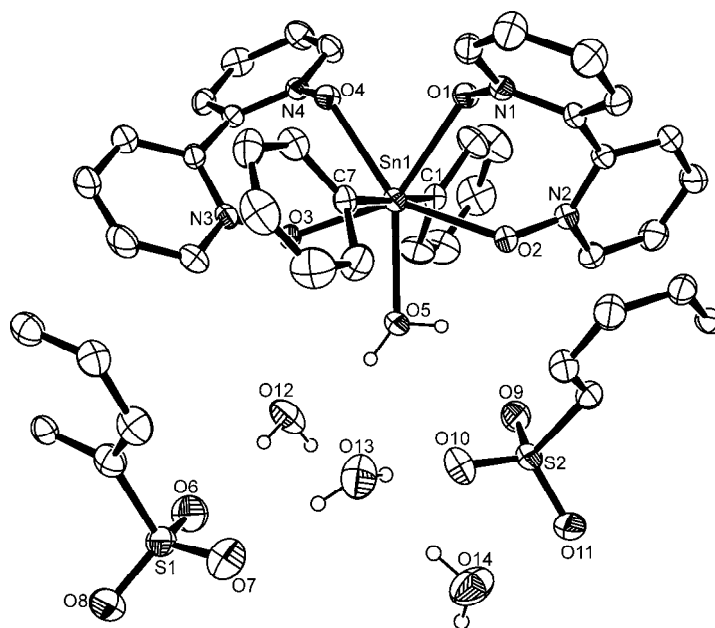

**Figure S6:** ORTEP representation of the asymmetric unit of  $3 \cdot 3\text{H}_2\text{O}$ , shown at 50 % probability displacement ellipsoids. Hydrogen atoms of only water molecules are shown.

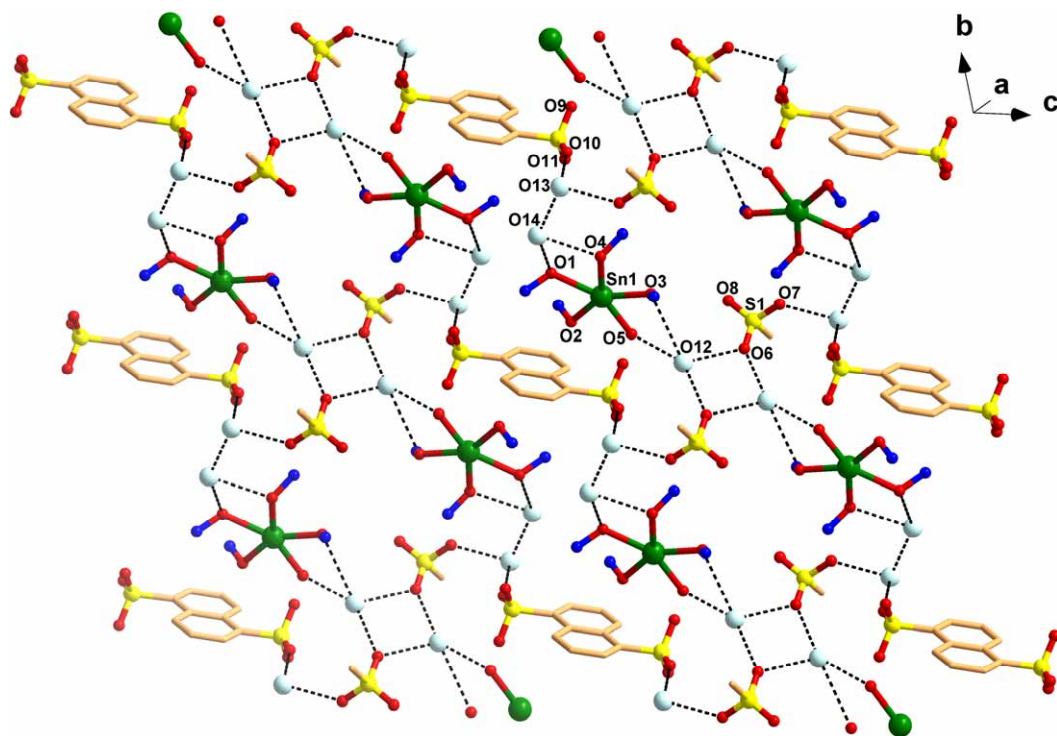

**Figure S7:** 2D-H-bonded sheet of  $3 \cdot 3\text{H}_2\text{O}$  mediated by O–H...O interactions. Guest water molecules are shown as *light blue* spheres. *Phenyl* groups of tin and aromatic rings of BPDO-I ligand and all the hydrogen atoms have been omitted for clarity.



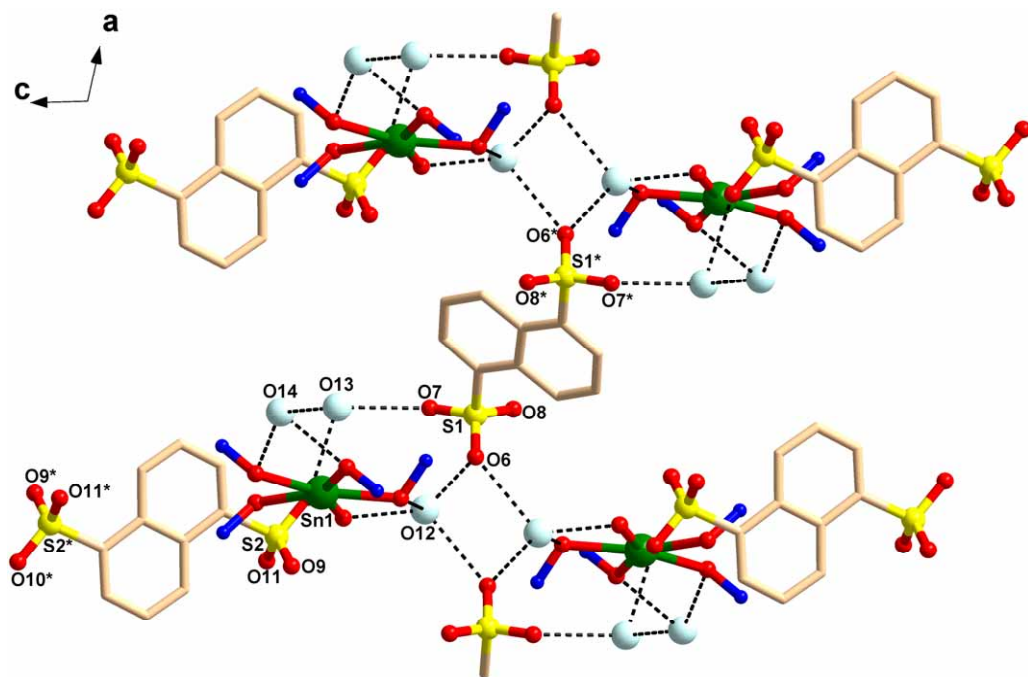

**Figure S8:** Formation of 3D-assembly in  $3 \cdot 3\text{H}_2\text{O}$  assisted by H-bonding interactions between lattice water molecules and second set of 1,5-naphthalene-disulfonate anions (S1, O6 O7 O8).

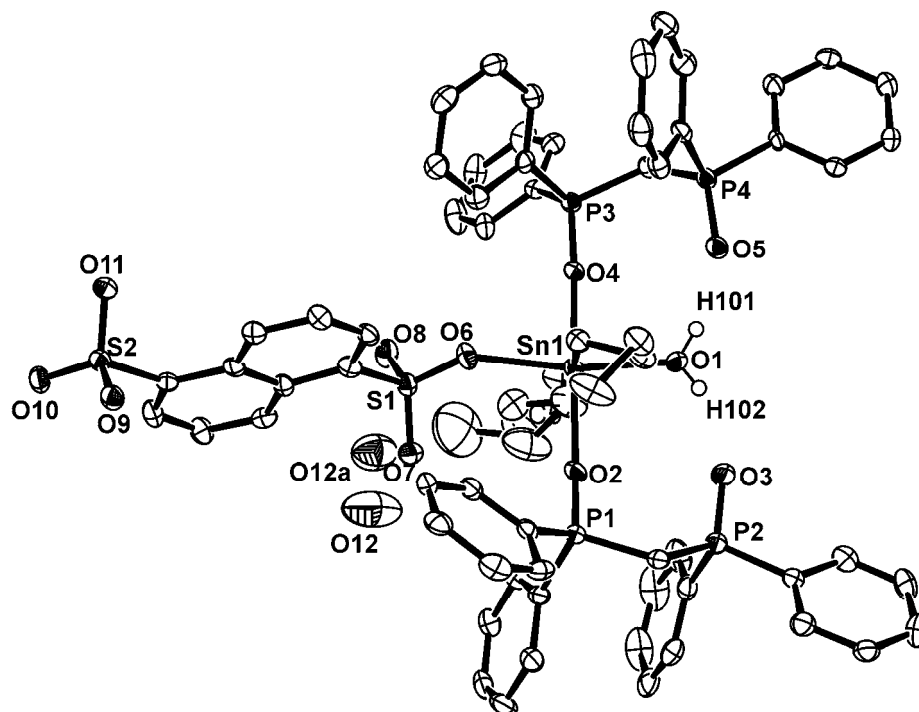

**Figure S9:** ORTEP representation of the asymmetric unit of  $4 \cdot \text{H}_2\text{O}$ , shown at 30 % probability displacement ellipsoids. Two of the carbons of one of the two *n*-butyl groups are triply disordered ((C6, C6a & C6b) and (C7, C7a & C7b)). Hydrogen atoms (except those of tin bound water molecule) are excluded for clarity.

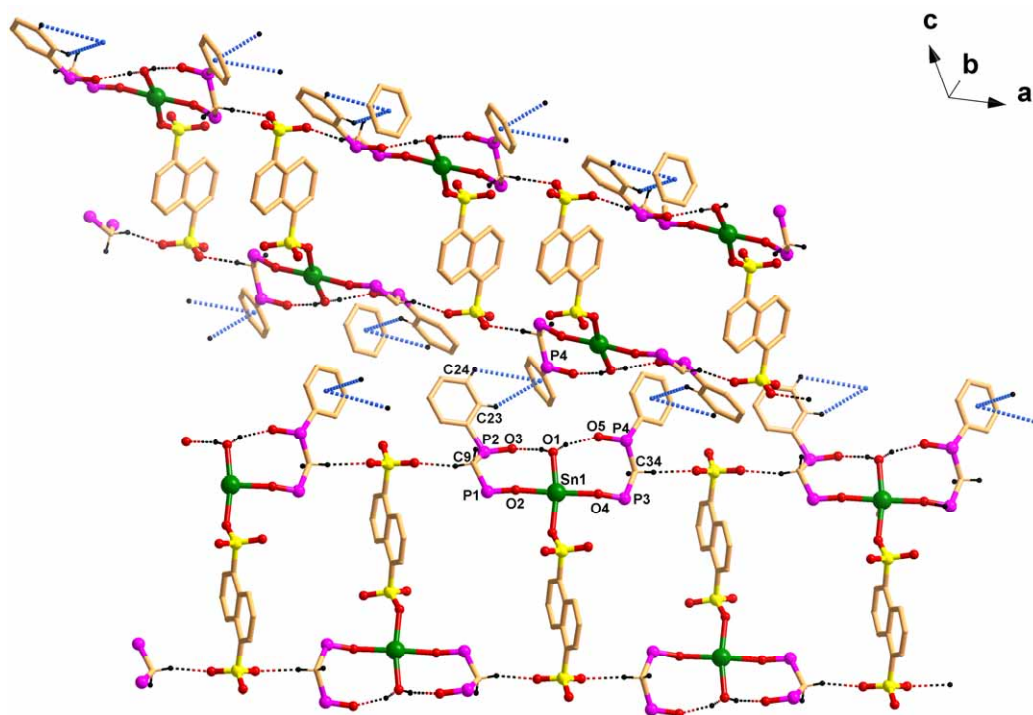

(a)

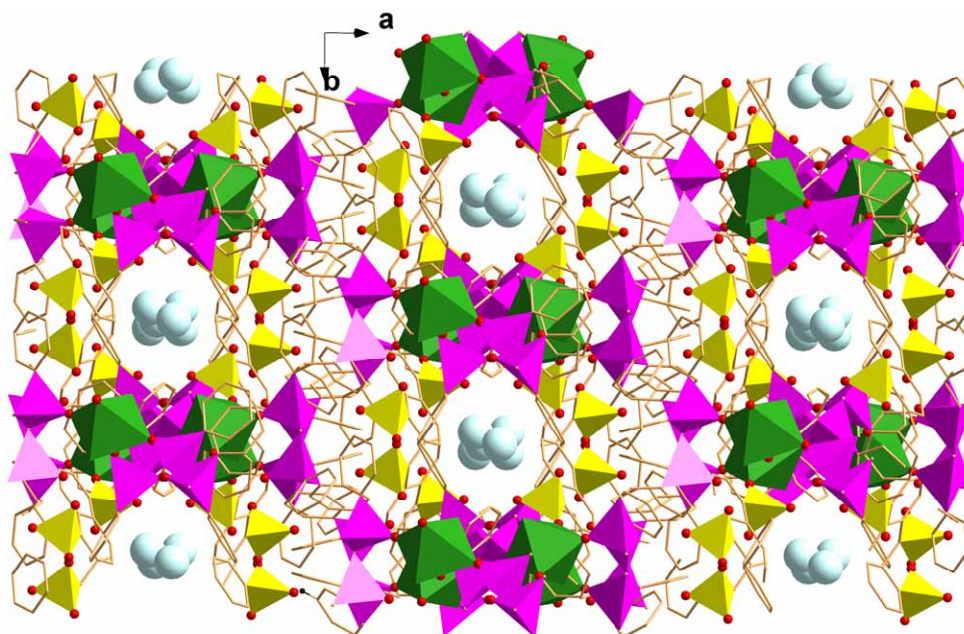

(b)

**Figure S10:** (a) C–H···O interactions extends the H-bonded dimers of 4·H<sub>2</sub>O in to 1D-tapes. Two such tapes crossing each other, are glued at points through C–H··· $\pi$  contacts. (b) ) A 3D-supramolecular net formed by 4 due to crosslinking of its 1D-H-bonded tapes (Figure S10(a)) ‘Green’, ‘violet’ and

'yellow' colored polyhedra represents Sn, P and S atoms respectively). Disordered solvent (water) molecules, depicted as *light blue* spheres, are occupying the channels present parallel to the *c* axis.

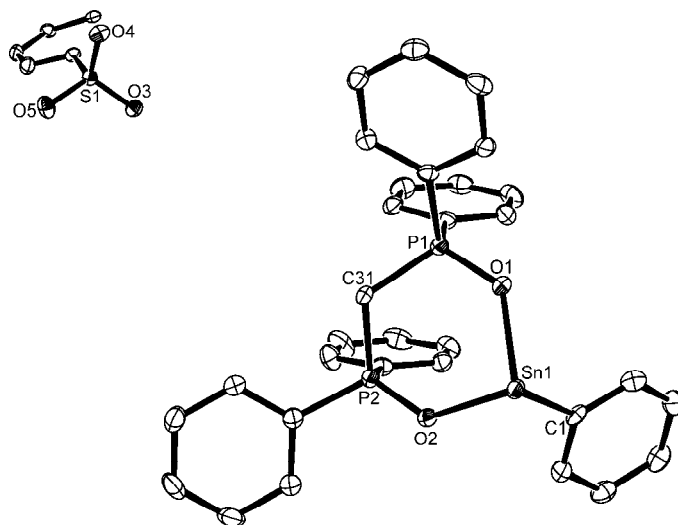

**Figure S11:** ORTEP representation of the asymmetric unit of **5** shown at 50 % probability displacement ellipsoids. Hydrogen atoms are not shown.

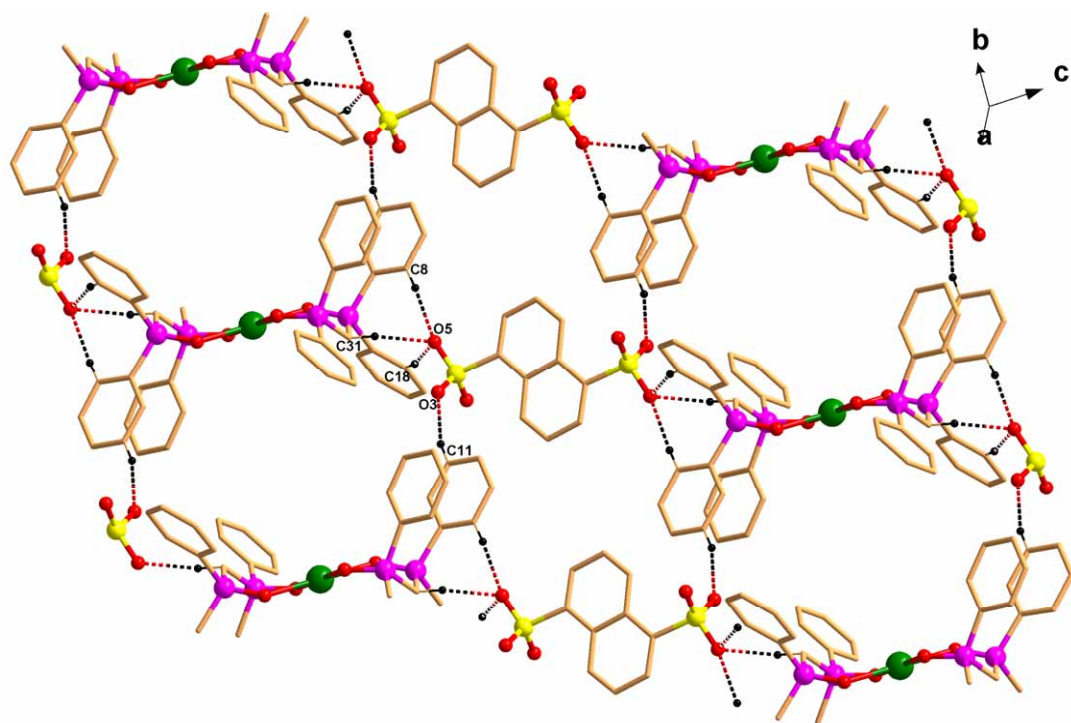

(a)

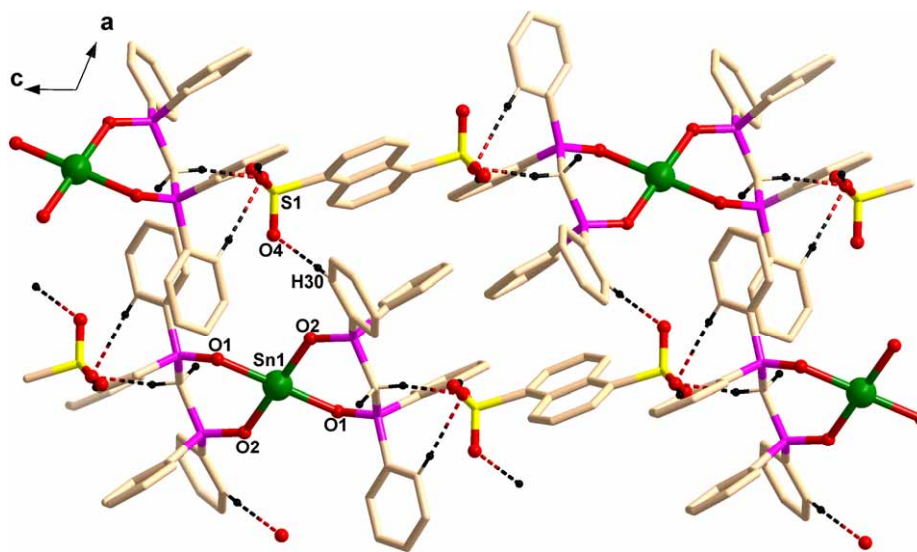

(b)

**Figure S12.** (a) 2D-supramolecular sheet of **5**, built by C–H...O hydrogen bonds (C11–H11...O3 2.424(3) Å, 164.51(23)°). For parameters involved see Table S8B. (b) View of 3D-packing of **5** in the crystal lattice, down the crystallographic *b* axis, reveal C–H...O contacts (C30–H30...O4) between aromatic CHs of DPPOM and oxygen atoms of the disulfonate anion adhering 2D-layers of **5** [shown in Figure S12(a)] (C30–H30...O42.377(2), 170.78(22) )

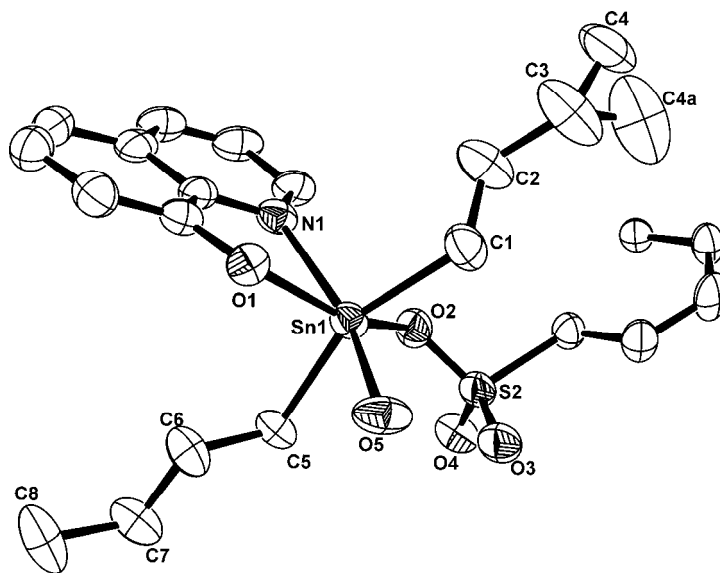

**Figure S13:** ORTEP representation of the asymmetric content of **6** shown at 30 % probability displacement ellipsoids. Hydrogen atoms are not shown.

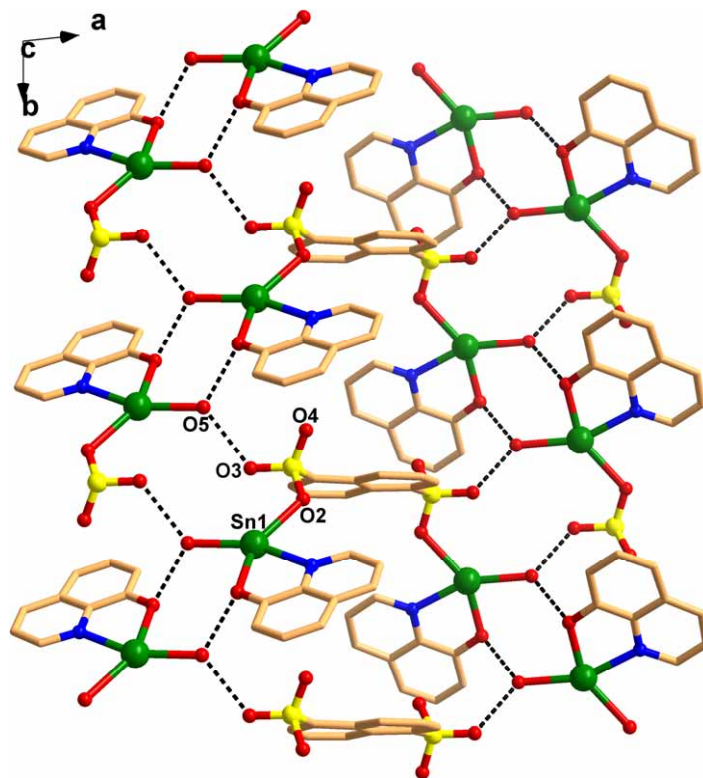

**Figure S14:** Formation of two dimensional assembly by **6** parallel to the *ab* plane

**Table S1.** Crystal data collection and refinement parameters for **1**.

|                                                  | <b>1</b>                                                                                          |
|--------------------------------------------------|---------------------------------------------------------------------------------------------------|
| Empirical formula                                | C <sub>28</sub> H <sub>32</sub> N <sub>2</sub> O <sub>8</sub> S <sub>2</sub> Sn                   |
| Formula Weight                                   | 707.37                                                                                            |
| Temperature(K)                                   | 293(2)                                                                                            |
| Wavelength(Mo <sub>Kα</sub> )                    | 0.71069 Å                                                                                         |
| Crystal system                                   | Monoclinic                                                                                        |
| Space group                                      | C2/c                                                                                              |
| Unit cell dimensions                             | a = 25.099(5) Å<br>b = 15.666(5) Å<br>c = 19.433(5) Å<br>α = 90 °<br>β = 129.327(5) °<br>γ = 90 ° |
| Volume                                           | 5911(3) Å <sup>3</sup>                                                                            |
| Z, Density (Calculated)                          | 8, 1.590 mg/m <sup>3</sup>                                                                        |
| Absorption coefficient                           | 1.058 mm <sup>-1</sup>                                                                            |
| F (000)                                          | 2880                                                                                              |
| Crystal size(mm)                                 | 0.11 x 0.08 x 0.04 mm                                                                             |
| θ range for data collection                      | 2.54 to 26.00 °                                                                                   |
| Limiting indices                                 | -30 ≤ h ≤ 15,<br>-19 ≤ k ≤ 19,<br>-23 ≤ l ≤ 23                                                    |
| Reflections collected/ unique                    | 16015/5781<br>[R(int)= 0.0401]                                                                    |
| Completeness to θ                                | 99.4 (θ = 26.00 °)                                                                                |
| Data/ restraints/ parameters                     | 5781 / 83 / 390                                                                                   |
| Goodness - of - fit on F <sup>2</sup>            | 1.083                                                                                             |
| Final R indices [I > 2σ (I)]                     | R1 = 0.0452, wR2 = 0.1254                                                                         |
| R indices (all data)                             | R1 = 0.0543, wR2 = 0.1375                                                                         |
| Largest diff. peak and hole (e.Å <sup>-3</sup> ) | 1.765 and -0.820 e.Å <sup>-3</sup>                                                                |
| Refinement method                                | Full-matrix least-squares on F <sup>2</sup>                                                       |

**Table S2.** Crystal data collection and refinement parameters for **2-4**

|                                       | <b>2·2CH<sub>3</sub>OH</b>                                                                              | <b>3·3H<sub>2</sub>O</b>                                                                                          | <b>4·H<sub>2</sub>O</b>                                                                           |
|---------------------------------------|---------------------------------------------------------------------------------------------------------|-------------------------------------------------------------------------------------------------------------------|---------------------------------------------------------------------------------------------------|
| Empirical formula                     | C <sub>34</sub> H <sub>38</sub> N <sub>2</sub> O <sub>13</sub> S <sub>2</sub> Sn                        | C <sub>42</sub> H <sub>40</sub> N <sub>4</sub> O <sub>14</sub> S <sub>2</sub> Sn                                  | C <sub>68</sub> H <sub>72</sub> O <sub>12</sub> P <sub>4</sub> S <sub>2</sub> Sn                  |
| Formula Weight                        | 865.47                                                                                                  | 1007.59                                                                                                           | 1387.95                                                                                           |
| Temperature(K)                        | 153(2)                                                                                                  | 293(2)                                                                                                            | 100(2)                                                                                            |
| Wavelength(Mo <sub>Kα</sub> )         | 0.71073 Å                                                                                               | 0.71069 Å                                                                                                         | 0.71069 Å                                                                                         |
| Crystal system                        | Monoclinic                                                                                              | Triclinic                                                                                                         | Monoclinic                                                                                        |
| Space group                           | C2/c                                                                                                    | P-1                                                                                                               | C2/c                                                                                              |
| Unit cell dimensions                  | a = 18.2329(13) Å<br>b = 11.0763(8) Å<br>c = 18.0241(13) Å<br>α = 90 °<br>β = 99.3740(10) °<br>γ = 90 ° | a = 10.526(5) Å<br>b = 11.739(5) Å<br>c = 18.285(5) Å<br>α = 92.530(5) °<br>β = 103.242 (5) °<br>γ = 100.479(5) ° | a = 33.071(5) Å<br>b = 11.224(5) Å<br>c = 37.192(5) Å<br>α = 90 °<br>β = 114.090(5) °<br>γ = 90 ° |
| Volume                                | 3591.4(4) Å <sup>3</sup>                                                                                | 2153.9(15) Å <sup>3</sup>                                                                                         | 12603(6) Å <sup>3</sup>                                                                           |
| Z, Density (Calculated)               | 4, 1.601 mg/m <sup>3</sup>                                                                              | 2, 1.554 mg/m <sup>3</sup>                                                                                        | 8, 1.463 mg/m <sup>3</sup>                                                                        |
| Absorption coefficient                | 0.897 mm <sup>-1</sup>                                                                                  | 0.763 mm <sup>-1</sup>                                                                                            | 0.637 mm <sup>-1</sup>                                                                            |
| F (000)                               | 1768                                                                                                    | 1028                                                                                                              | 5744                                                                                              |
| Crystal size(mm)                      | 0.12 x 0.08 x 0.04 mm                                                                                   | 0.10 x 0.08 x 0.06 mm                                                                                             | 0.10 x 0.06 x 0.04 mm                                                                             |
| θ range for data collection           | 2.16 to 26.00 °                                                                                         | 2.02 to 25.00 °                                                                                                   | 2.11 to 25.00 °                                                                                   |
| Limiting indices                      | -22 ≤ h ≤ 22, -13 ≤ k ≤ 11, -21 ≤ l ≤ 22                                                                | -12 ≤ h ≤ 10, -8 ≤ k ≤ 13, -21 ≤ l ≤ 18                                                                           | -37 ≤ h ≤ 39, -11 ≤ k ≤ 13, -44 ≤ l ≤ 44                                                          |
| Reflections collected/ unique         | 9742 / 3518 [R(int)=0.0237]                                                                             | 10866 / 7408 [R(int)=0.0269]                                                                                      | 31925 / 11069 [R(int)=0.0877]                                                                     |
| Completeness to θ                     | 99.7 % (θ = 26.00 °)                                                                                    | 97.6 % (θ = 25.00 °)                                                                                              | 99.7 % (θ = 25.00 °)                                                                              |
| Data/ restraints/ parameters          | 3518 / 5 / 249                                                                                          | 7408 / 30 / 592                                                                                                   | 11069 / 358 / 848                                                                                 |
| Goodness - of - fit on F <sup>2</sup> | 1.075                                                                                                   | 1.026                                                                                                             | 1.029                                                                                             |
| Final R indices [I > 2σ (I)]          | R1 = 0.0271, wR2 = 0.0654                                                                               | R1 = 0.0474, wR2 = 0.1248                                                                                         | R1 = 0.0592, wR2 = 0.1454                                                                         |
| R indices (all data)                  | R1 = 0.0289, wR2 = 0.0665                                                                               | R1 = 0.0577, wR2 = 0.1361                                                                                         | R1 = 0.0913, wR2 = 0.1659                                                                         |
| Largest diff. peak and hole           | 0.813 and -0.374 e.Å <sup>-3</sup>                                                                      | 1.304 and -0.436 e.Å <sup>-3</sup>                                                                                | 1.698 and -1.023 e.Å <sup>-3</sup>                                                                |
| Refinement method                     | Full-matrix least-squares on F <sup>2</sup>                                                             | Full-matrix least-squares on F <sup>2</sup>                                                                       | Full-matrix least-squares on F <sup>2</sup>                                                       |



**Table S3.** Crystal data collection and refinement parameters for **5** and **6**

|                                        | <b>5</b>                                                                                                                          | <b>6</b>                                                                                                                         |
|----------------------------------------|-----------------------------------------------------------------------------------------------------------------------------------|----------------------------------------------------------------------------------------------------------------------------------|
| Empirical formula                      | C <sub>72</sub> H <sub>60</sub> O <sub>10</sub> P <sub>4</sub> S <sub>2</sub> Sn                                                  | C <sub>44</sub> H <sub>58</sub> N <sub>2</sub> O <sub>10</sub> S <sub>2</sub> Sn <sub>2</sub>                                    |
| Formula Weight                         | 1391.89                                                                                                                           | 1076.42                                                                                                                          |
| Temperature(K)                         | 100(2)                                                                                                                            | 293(2)                                                                                                                           |
| Wavelength(MoK $\alpha$ )              | 0.71069 Å                                                                                                                         | 0.71069 Å                                                                                                                        |
| Crystal system                         | Monoclinic                                                                                                                        | Monoclinic                                                                                                                       |
| Space group                            | P2(1)/n                                                                                                                           | C2/c                                                                                                                             |
| Unit cell dimensions                   | a = 15.154(5) Å<br>b = 11.657(5) Å<br>c = 19.051(5) Å<br>$\alpha = 90^\circ$<br>$\beta = 112.254(5)^\circ$<br>$\gamma = 90^\circ$ | a = 25.783(5) Å<br>b = 8.597(5) Å<br>c = 24.133(5) Å<br>$\alpha = 90^\circ$<br>$\beta = 116.270(5)^\circ$<br>$\gamma = 90^\circ$ |
| Volume                                 | 3114.7(19) Å <sup>3</sup>                                                                                                         | 4796.8(3) Å <sup>3</sup>                                                                                                         |
| Z, Density (Calculated)                | 2, 1.484 mg/m <sup>3</sup>                                                                                                        | 4, 1.491 mg/m <sup>3</sup>                                                                                                       |
| Absorption coefficient                 | 0.642 mm <sup>-1</sup>                                                                                                            | 1.183 mm <sup>-1</sup>                                                                                                           |
| F (000)                                | 1428                                                                                                                              | 2192                                                                                                                             |
| Crystal size(mm)                       | 0.09 x 0.05 x 0.03 mm                                                                                                             | 0.09 x 0.07 x 0.06 mm                                                                                                            |
| $\theta$ range for data collection     | 2.09 to 25.00 °                                                                                                                   | 2.53 to 28.27 °                                                                                                                  |
| Limiting indices                       | -18 $\leq$ h $\leq$ 12, -11 $\leq$ k $\leq$ 13,<br>-19 $\leq$ l $\leq$ 22                                                         | -33 $\leq$ h $\leq$ 34, -11 $\leq$ k $\leq$ 8, -<br>31 $\leq$ l $\leq$ 31                                                        |
| Reflections collected/ unique          | 15603 / 5471 [R(int)=<br>0.0542]                                                                                                  | 14974 / 5837 [R(int)=<br>0.0514]                                                                                                 |
| Completeness to $\theta$               | 99.9 % ( $\theta = 25.00^\circ$ )                                                                                                 | 98.1 % ( $\theta = 28.27^\circ$ )                                                                                                |
| Data/ restraints/ parameters           | 5471 / 0 / 403                                                                                                                    | 5837 / 46 / 281                                                                                                                  |
| Goodness - of - fit on F <sup>2</sup>  | 1.094                                                                                                                             | 1.020                                                                                                                            |
| Final R indices [I $>$ 2 $\sigma$ (I)] | R1 = 0.0440, wR2 =<br>0.1087                                                                                                      | R1 = 0.0593, wR2 =<br>0.1599                                                                                                     |
| R indices (all data)                   | R1 = 0.0550, wR2 =<br>0.1229                                                                                                      | R1 = 0.1011, wR2 =<br>0.2125                                                                                                     |
| Largest diff. peak and hole            | 1.612 and -0.585 e.Å <sup>-3</sup>                                                                                                | 1.102 and -1.093 e.Å <sup>-3</sup>                                                                                               |
| Refinement method                      | Full-matrix least-squares<br>on F <sup>2</sup>                                                                                    | Full-matrix least-squares<br>on F <sup>2</sup>                                                                                   |

**Table S4A.** Selected bond distances and bond angles for **1**

| <b>Bond distances (Å)</b> |                      | <b>Bond angles (°)</b> |  |
|---------------------------|----------------------|------------------------|--|
| Sn1–C1 2.128(4)           | C1–Sn1–C5 173.69(19) | C5–Sn1–O6 82.01(16)    |  |
| Sn1–C5 2.125(4)           | O1–Sn1–O6 169.50(10) | C1–Sn1–O6 92.87(14)    |  |
| Sn1–O1 2.234(3)           | O2–Sn1–O3 175.90(10) | O2–Sn1–O6 92.88(10)    |  |
| Sn1–O2 2.220(3)           | C5–Sn1–O2 94.12(18)  | O3–Sn1–O6 90.44(11)    |  |
| Sn1–O3 2.257(3)           | C1–Sn1–O2 89.80(14)  |                        |  |
| Sn1–O6 2.267(3)           | C5–Sn1–O1 90.57(16)  |                        |  |
| S1–O3 1.479(3)            | C1–Sn1–O1 94.97(14)  |                        |  |
| S1–O4 1.447(3)            | O2–Sn1–O1 80.20(18)  |                        |  |
| S1–O5 1.438(3)            | C5–Sn1–O3 88.71(19)  |                        |  |
| N1–O1 1.341(4)            | C1–Sn1–O3 87.64(14)  |                        |  |
| N2–O2 1.333(4)            | O1–Sn1–O3 96.83(11)  |                        |  |

**Table S4B.** Hydrogen bonding parameters of **1**.

| <b>D–H...A</b>                                                                 | <b>D–H</b><br>(Å) | <b>H...A</b><br>(Å) | <b>D...A</b><br>(Å) | <b>D–H...A</b><br>(°) | <b>symmetry</b>     |
|--------------------------------------------------------------------------------|-------------------|---------------------|---------------------|-----------------------|---------------------|
| C18–H18...O4                                                                   | 0.930(4)          | 2.433(3)            | 3.243(5)            | 145.58(30)            | 1.5-x,-0.5+y,0.5-z  |
| C15–H15...O8                                                                   | 0.930(4)          | 2.484(3)            | 3.267(5)            | 142.01(30)            | 0.5+x, 0.5-y, 0.5+z |
| C11–H11...O7                                                                   | 0.930(6)          | 2.460(5)            | 3.265(8)            | 144.99(31)            | 1.5-x,0.5-y, -z     |
| $\pi_{\text{cent}} \cdots \pi_{\text{cent}}$ (N1 C9-C13; C19-C23) = 3.669(6) Å |                   |                     |                     |                       |                     |

**Table S5A.** Selected bond parameters of 2·2CH<sub>3</sub>OH

| Bond distances (Å)                                                                        | Bond angles (°)        |
|-------------------------------------------------------------------------------------------|------------------------|
| Sn1-C1 2.119(2)                                                                           | C1-Sn1-C1* 175.46(12)  |
| Sn1-O1 2.297(2)                                                                           | O1-Sn1-O1* 74.99(7)    |
| Sn1-O1* 2.297(2)                                                                          | O1-Sn1-O2 69.46(6)     |
| Sn1-O2 2.336(2)                                                                           | O3-Sn1-O2 73.10(4)     |
| Sn1-O2* 2.336(2)                                                                          | O3-Sn1-O2* 73.10(4)    |
| Sn1-O3 2.240(2)                                                                           | O2*-Sn1-O1* 69.46(6)   |
| S1-O4 1.456(2)                                                                            | O1- Sn1-O2* 144.30(6)  |
| S1-O5 1.462(2)                                                                            | O1- Sn1-O3 142.50(4)   |
| S1-O6 1.452(2)                                                                            | O2-Sn1-O2* 146.21(8)   |
| N1-O1 1.336(2)                                                                            | O2- Sn1- O1* 144.30(6) |
|                                                                                           | O3-Sn1- O1* 142.51(4)  |
| Symmetry transformations used to generate equivalent atoms: C1*, O1*, O2* -x+1, y, -z+1.5 |                        |

**Table S5B.** Hydrogen bonding parameters of 2·2CH<sub>3</sub>OH

| D-H...A      | D-H<br>(Å) | H...A<br>(Å) | D...A<br>(Å) | D-H...A<br>(°) | symmetry         |
|--------------|------------|--------------|--------------|----------------|------------------|
| O2-H102...O6 | 0.795(2)   | 2.029(3)     | 2.816(2)     | 170.41(24)     | x, -1+y, z       |
| O3-H103...O5 | 0.804(3)   | 1.859(2)     | 2.654(2)     | 170.01(24)     | 1-x, -1+y, 1.5-z |
| O7-H104...O4 | 0.783(2)   | 1.933(2)     | 2.710(2)     | 171.63(19)     | 0.5+x, -0.5+y, z |
| O2-H101...O7 | 0.797(3)   | 1.950(3)     | 2.725(2)     | 163.65(25)     | 1-x, y, 1.5-z    |
| C10-H10...O5 | 0.930(2)   | 2.441(2)     | 3.323(3)     | 158.40(14)     | x, y, z          |
| C7-H7...O4   | 0.930(2)   | 2.484(2)     | 3.375(3)     | 160.47(14)     | 0.5+x, -0.5+y, z |

**Table S6A.** Selected bond parameters of **3·3H<sub>2</sub>O**

| <b>Bond distances (Å)</b> | <b>Bond angles (°)</b> |
|---------------------------|------------------------|
| Sn1-C1 2.116(4)           | C1-Sn1-C7 176.22(15)   |
| Sn1-C7 2.122(4)           | O1-Sn1-O2 71.23(10)    |
| Sn1-O1 2.370(3)           | O2-Sn1-O5 71.98(11)    |
| Sn1-O2 2.286(3)           | O5-Sn1-O3 72.87(10)    |
| Sn1-O3 2.270(3)           | O3-Sn1-O4 72.95(10)    |
| Sn1-O4 2.333(3)           | O4-Sn1-O1 71.02(10)    |
| Sn1-O5 2.249(3)           | O5-Sn1-O1 143.20(11)   |
| S1-O6 1.425(4)            | O3-Sn1-O2 144.85(10)   |
| S1-O7 1.482(4)            | O3-Sn1-O1 143.90(10)   |
| S1-O8 1.418(4)            | O2-Sn1-O4 142.19(10)   |
| S2-O9 1.464(4)            | O5-Sn1-O4 145.77(10)   |
| S2-O10 1.447(4)           |                        |
| S2-O11 1.449(4)           |                        |
| N1-O1 1.330(4)            |                        |
| N2-O2 1.336(4)            |                        |
| N3-O3 1.340(4)            |                        |
| N4-O4 1.332(4)            |                        |

**Table S6B.** D...A bond distances for hydrogen bonds in **3**·3H<sub>2</sub>O

| <b>D...A</b> | <b>D...A<br/>(Å)</b> | <b>symmetry</b> |
|--------------|----------------------|-----------------|
| O5...O9      | 2.769(6)             | x, y, z         |
| O5...O12     | 2.656(5)             | x, y, z         |
| O12...O6     | 2.845(6)             | 1-x, 1-y, 1-z   |
| O12...O6*    | 2.789(6)             | x, y, z         |
| O13...O10    | 2.779(6)             | x, y, z         |
| O14...O13    | 2.796(8)             | x, y, z         |
| O14...O4     | 2.953(3)             | x, -1+y, z      |

**Table S7A.** Selected bond parameters of **4·H<sub>2</sub>O**

| <b>Bond distances (Å)</b> | <b>Bond angles (°)</b> |
|---------------------------|------------------------|
| Sn1-C1 2.119(5)           | C1-Sn1-C5 175.5(3)     |
| Sn1-C5 2.148(8)           | O1-Sn1-O6 169.70(14)   |
| Sn1-O1 2.200(4)           | O2-Sn1-O4 177.73(14)   |
| Sn1-O2 2.181(4)           | O1-Sn1-O4 94.82(14)    |
| Sn1-O4 2.227(4)           | O4-Sn1-O6 95.38(14)    |
| Sn1-O6 2.267(4)           | O6-Sn1-O2 86.12(14)    |
| P1-O2 1.497(4)            | O2-Sn1-O1 83.73(14)    |
| P2-O3 1.494(4)            |                        |
| P3-O4 1.499(4)            |                        |
| P4-O5 1.480(4)            |                        |
| S1-O6 1.483(4)            |                        |
| S1-O7 1.439(4)            |                        |
| S1-O8 1.438(4)            |                        |
| S2-O9 1.454(4)            |                        |
| S2-O10 1.443(4)           |                        |
| S2-O11 1.445(4)           |                        |

**Table S7B.** Hydrogen bonding parameters of 4·H<sub>2</sub>O

| <b>D–H...A</b>           | <b>D–H</b><br>(Å) | <b>H...A</b><br>(Å) | <b>D...A</b><br>(Å) | <b>D–H...A</b><br>(°) | <b>symmetry</b>      |
|--------------------------|-------------------|---------------------|---------------------|-----------------------|----------------------|
| O1–H101...O5             | 0.830(6)          | 1.795(6)            | 2.591(6)            | 160.09(66)            | x, y, z              |
| O1–H102...O3             | 0.838(6)          | 1.859(6)            | 2.682(6)            | 166.97(59)            | x, y, z              |
| C34–H34B...O11           | 0.968(6)          | 2.295(4)            | 3.260(7)            | 175.25(34)            | 2-x, 2-y, 1-z        |
| C52–H52...O11            | 0.929(6)          | 2.609(4)            | 3.507(7)            | 162.68(35)            | 2-x, 2-y, 1-z        |
| C58–H58...O11            | 0.930(6)          | 2.552(4)            | 3.331(8)            | 141.46(35)            | 2-x, 2-y, 1-z        |
| C9–H9B...O9              | 0.969(5)          | 2.224(4)            | 3.145(7)            | 158.41(34)            | 1.5-x, 1.5-y,<br>1-z |
| <b>C–H...π distances</b> |                   |                     |                     |                       |                      |
| C38–H38...π              |                   |                     |                     | 3.157(4) Å            |                      |
| C39–H39...π              |                   |                     |                     | 3.107(5) Å            |                      |
| C40–H40...π              |                   |                     |                     | 3.177(5) Å            |                      |
| C23–H23...π              |                   |                     |                     | 2.744(4) Å            |                      |

**Table S8A.** Selected bond parameters of **5**

| Bond distances (Å) | Bond angles (°)         |
|--------------------|-------------------------|
| Sn1-C1 2.122(3)    | C1-Sn1-C1* 180.0(0)     |
| Sn1-O1 2.212(2)    | O1-Sn1-O1* 180.0(0)     |
| Sn1-O2 2.184(2)    | O2-Sn1-O2* 180.0(1)     |
| P1-O1 1.517(2)     | O1-Sn1-O2 87.60(8)      |
| P2-O2 1.521(2)     | O1-Sn1-O2* 92.40(8)     |
| S1-O3 1.457(2)     | O2*-Sn1-O1*<br>87.59(8) |
| S1-O4 1.448(2)     | O1*-Sn1-O2 92.40(8)     |
| S1-O5 1.460(3)     |                         |

Symmetry transformations used to generate equivalent atoms: C1\*, O1\*, O2\* -x+2, -y+2, -z

**Table S8B.** Hydrogen bonding parameters of **5**.

| D-H...A                                                  | D-H<br>(Å) | H...A<br>(Å) | D...A<br>(Å) | D-H...A<br>(°) | symmetry                |
|----------------------------------------------------------|------------|--------------|--------------|----------------|-------------------------|
| C31-H31...O5                                             | 0.969(4)   | 2.173(3)     | 3.129(5)     | 168.38(21)     | -0.5+x, 1.5-y,<br>0.5+z |
| C18-H18...O5                                             | 0.930(4)   | 2.500(3)     | 3.418(5)     | 169.64(22)     | -0.5+x, 1.5-y,<br>0.5+z |
| C8-H8...O5                                               | 0.930(4)   | 2.295(3)     | 3.219(4)     | 172.77(23)     | -0.5+x, 1.5-y,<br>0.5+z |
| C11-H11...O3                                             | 0.931(4)   | 2.424(3)     | 3.330(4)     | 164.51(23)     | -0.5+x, 2.5-y,<br>0.5+z |
| C30-H30...O4                                             | 0.930(3)   | 2.377(2)     | 3.298(4)     | 170.78(22)     | x, y, 1+z               |
| $\pi(\text{C19-C24}) \cdots \pi(7\text{-C12})$ 3.60(8) Å |            |              |              |                |                         |



**Table S9.** Selected bond parameters of **6**

| Bond distances (Å) | Bond angles (°)      |
|--------------------|----------------------|
| Sn1-C1 2.103(8)    | C1-Sn1-C5 156.4(4)   |
| Sn1-C5 2.127(6)    | O1-Sn1-O2 151.22(16) |
| Sn1-O1 2.125(4)    | N1-Sn1-O5 156.1(2)   |
| Sn1-N1 2.294(5)    | O1-Sn1-N1 74.28(18)  |
| Sn1-O5 2.309(5)    | N1-Sn1-O2 77.01(18)  |
| Sn1-O2 2.424(5)    | O2-Sn1-O5 126.71(18) |
| S2-O2 1.456(5)     | O5-Sn1-O1 81.90(19)  |
| S2-O3 1.463(5)     |                      |
| S2-O4 1.420(6)     |                      |

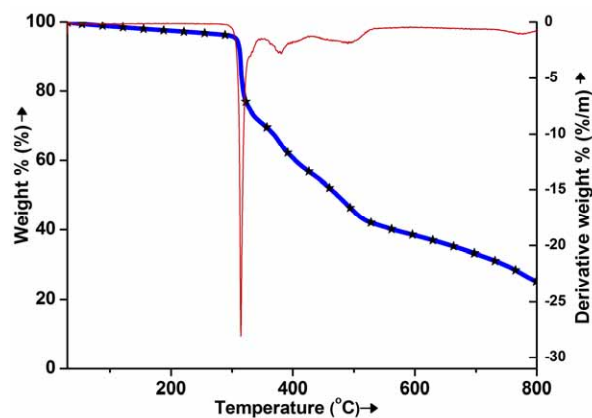

**Figure S15.** Thermogravimetric curve of **1**

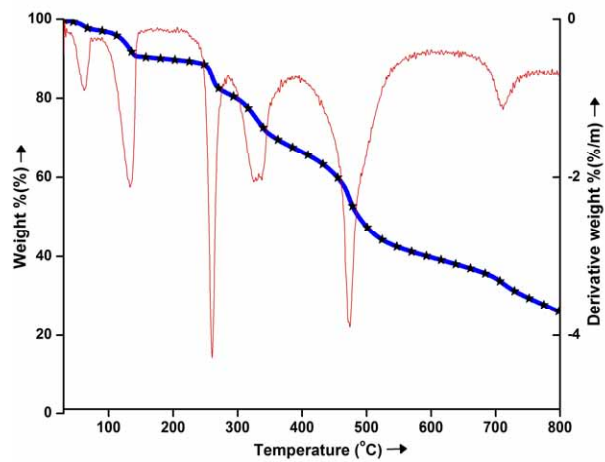

**Figure S16.** Thermogravimetric curve for 2·2CH<sub>3</sub>OH

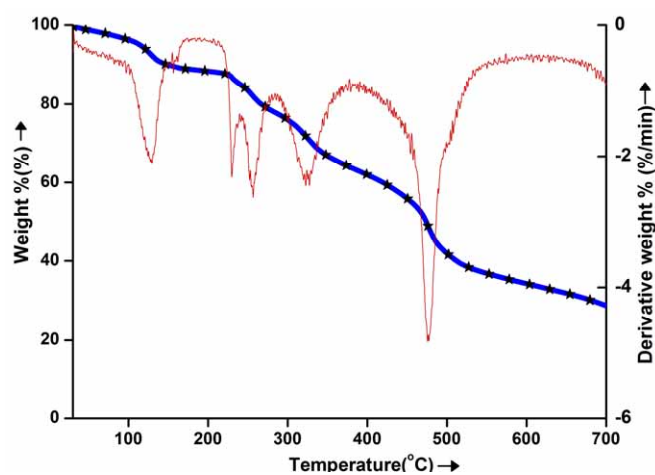

**Figure S17.** Thermogravimetric curve for 3·3H<sub>2</sub>O

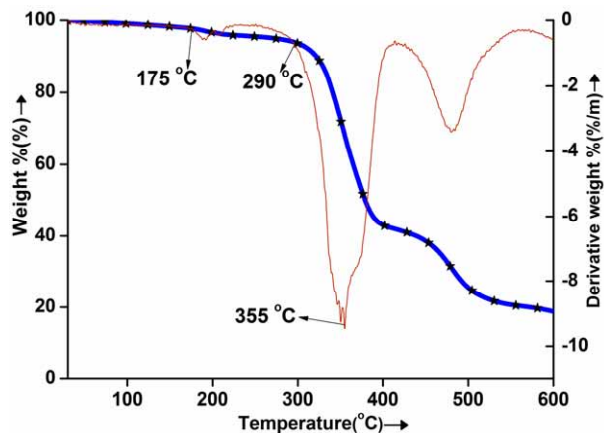

**Figure S18.** Thermogravimetric curve of 4·H<sub>2</sub>O

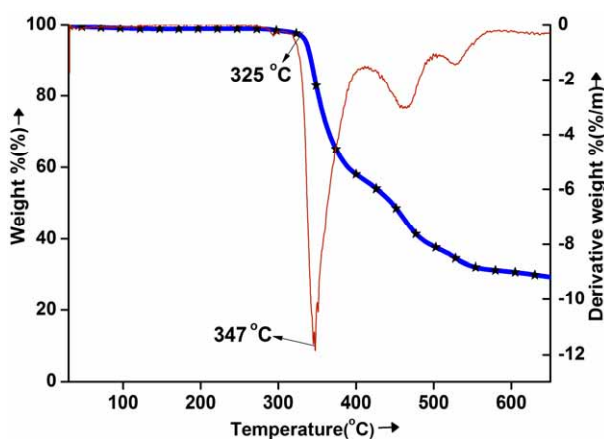

**Figure S19.** Thermogravimetric curve of 5

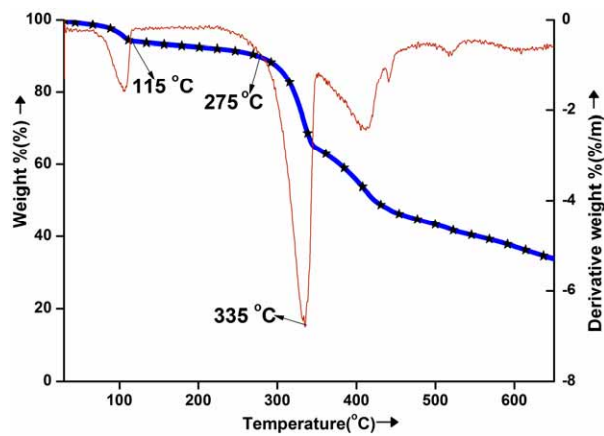

**Figure S20.** Thermogravimetric curve of 6
